# Supplementary material for: A highly ordered and damage-free Ge inverted pyramid array structure for broadband antireflection in the mid-infrared
Source: Royal Society of Chemistry journal article supplement (doi:10.1039/d1tc01134k), 2021-01-01
Supplement: d1tc01134k1.pdf [file d1tc01134k1.pdf]

Supporting information

# **Highly Ordered and Damage-Free Ge Inverted Pyramid Array Structure for Broadband Antireflection in the Mid-Infrared**

Sang-Ho Shin<sup>1,†</sup>, Yikai, Liao<sup>1,†</sup>, Bongkwon Son<sup>1</sup>, Zhi-Jun Zhao<sup>2</sup>, Jun-Ho Jeong<sup>2</sup>, Chuan Seng Tan<sup>1</sup>, and Munho Kim<sup>1\*</sup>

<sup>1</sup>School of Electrical and Electronic Engineering Nanyang Technological University,  
50 Nanyang Avenue, Singapore 639798

<sup>2</sup>Nano-Convergence Mechanical Systems Research Division, Korea Institute of  
Machinery and Materials, 156, Gajeongbuk-ro, Yuseong-gu, Daejeon 34103, South  
Korea

<sup>†</sup>These authors contributed equally to this work.

\*Author to whom correspondence should be addressed. Email: [munho.kim@ntu.edu.sg](mailto:munho.kim@ntu.edu.sg)

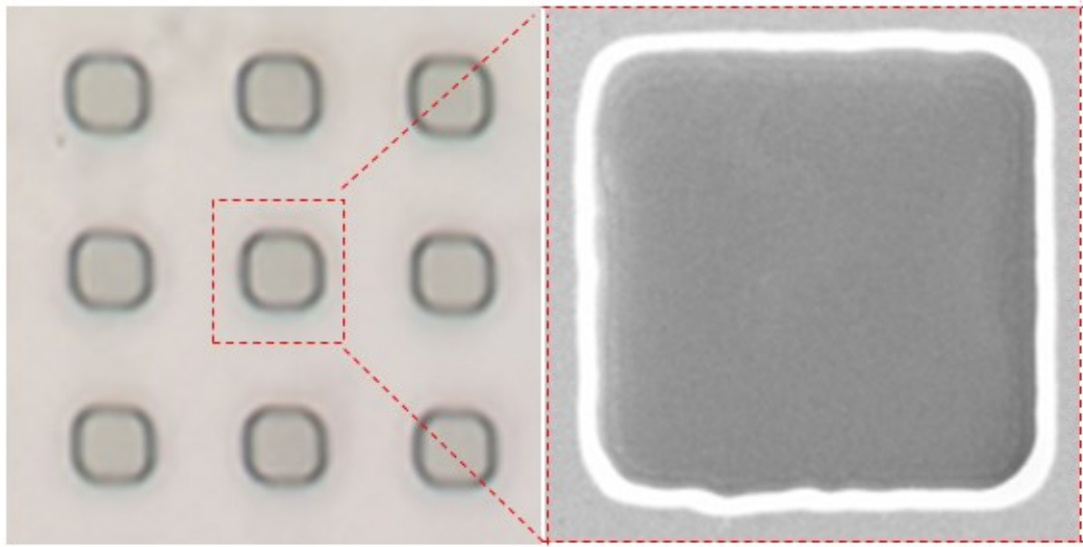

Figure S1. Optical microscopic image of photoresist mesh.

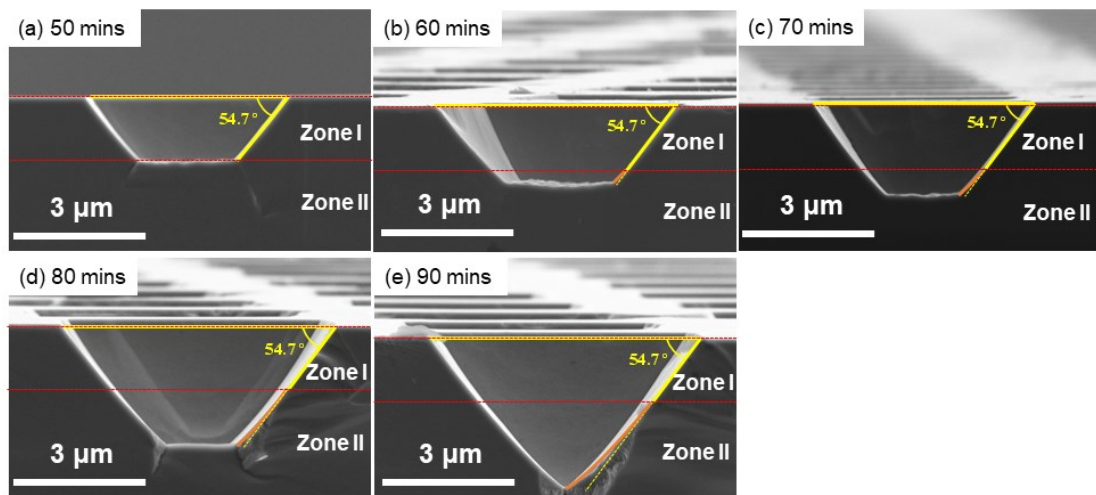

Figure S2. Formation process of inverted pyramid.

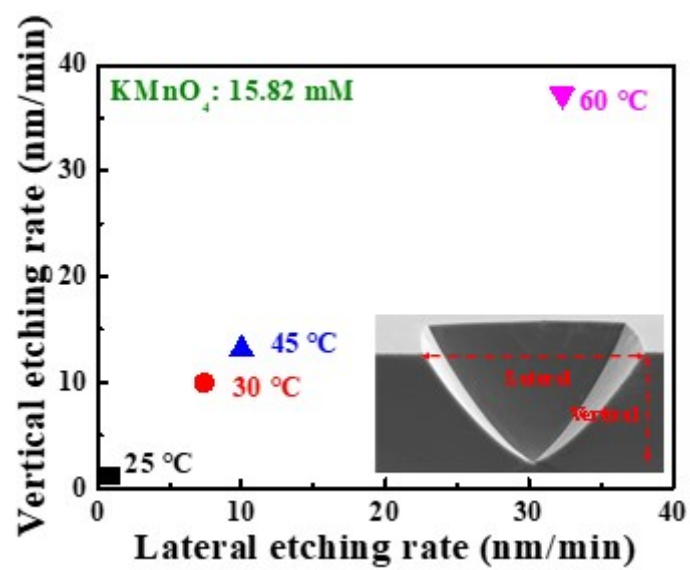

Figure S3. Vertical and lateral etching rate with different etching temperatures.

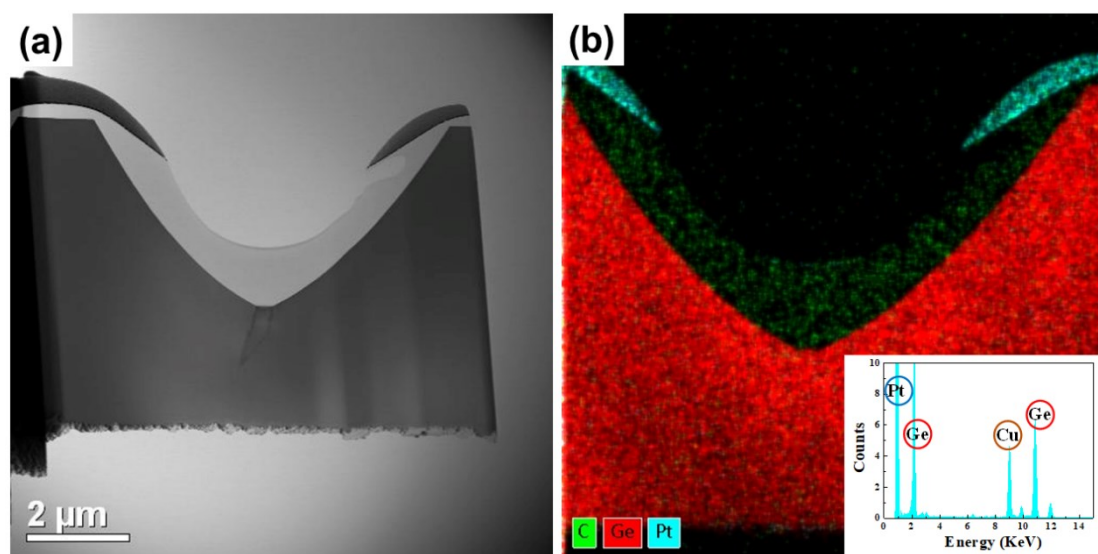

Figure S4. (a) Sampling of the inverted pyramid for TEM. (b) Mapping and amount of elements in the inverted pyramid.

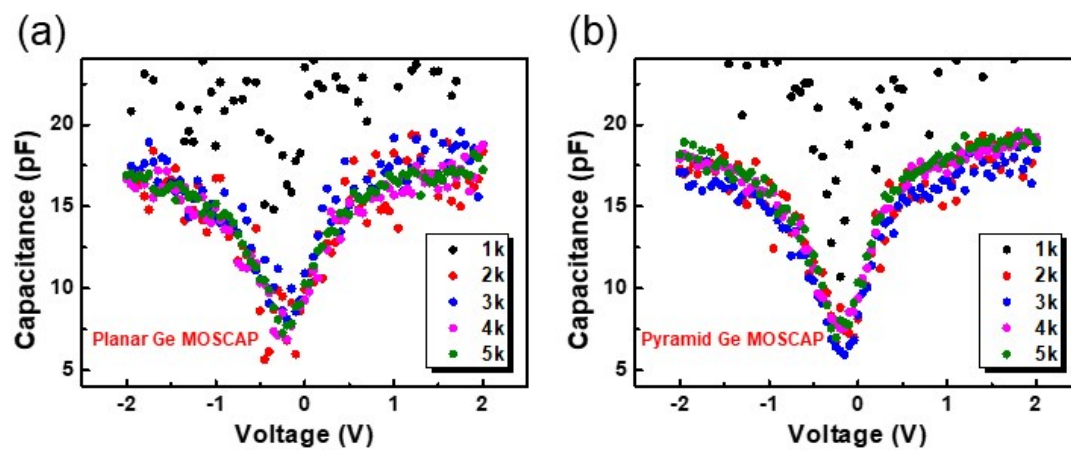

Figure S5. C-V characteristic of (a) planar and (b) pyramid Ge MOSCAPs with AC frequency from 1k to 5k.
